# Supplementary material
Source: PubMed Central journal article supplement (PMC7476219)
Supplement: NIHMS1624087-supplement-Supplementary_Information.pdf [file NIHMS1624087-supplement-Supplementary_Information.pdf]

## Supporting Information

Biomimetic Mineralization of Recombinamer-Based Hydrogels toward Controlled Morphologies and High Mineral Density

*Yuping Li<sup>1\*</sup>, Xi Chen<sup>1</sup>, Alex Fok<sup>1</sup>, Jose Carlos Rodriguez-Cabello<sup>2</sup>, Conrado Aparicio<sup>1\*</sup>*

<sup>1</sup> Minnesota Dental Research Center for Biomaterials and Biomechanics, University of

Minnesota, Minneapolis, MN, USA;

<sup>2</sup> GIR Bioforge, University of Valladolid, Valladolid, Spain

\*Corresponding Authors:

Conrado Aparicio and Yuping Li

Email: [apari003@umn.edu](mailto:apari003@umn.edu) and [lix1191@umn.edu](mailto:lix1191@umn.edu)

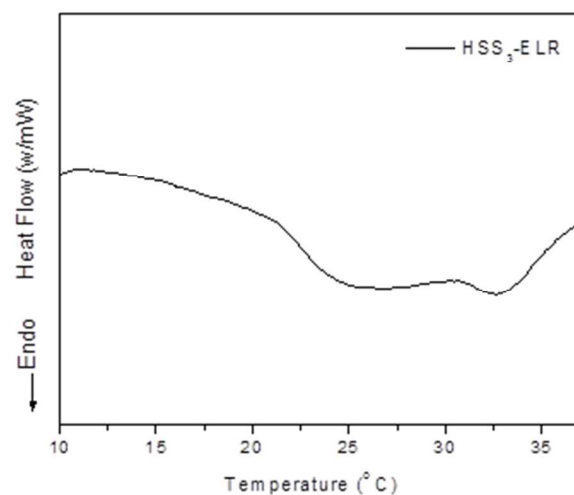

**Figure S1.** DSC analysis of a 50mg/ml solution of HSS<sub>3</sub>.

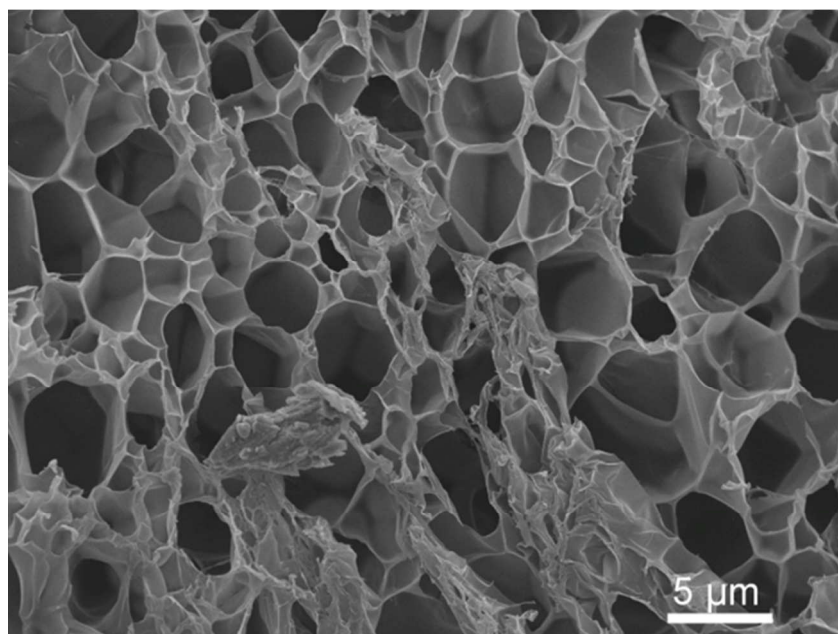

**Figure S2.** SEM image of the cross-linked HSS<sub>3</sub> hydrogel showing a microporous structure.

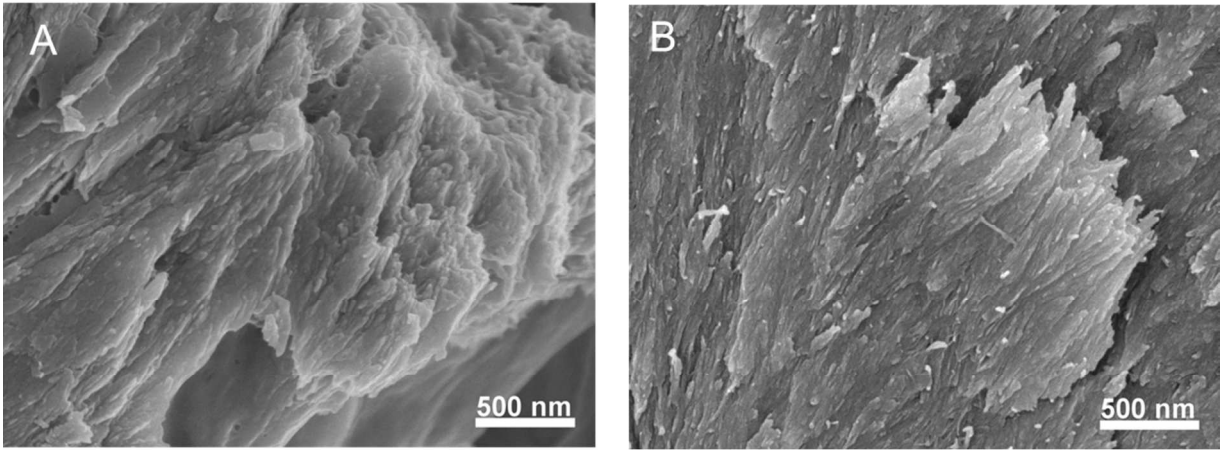

**Figure S3.** SEM images of the fractured HSS<sub>3</sub> hydrogel after 14 days of mineralization (A) and bovine cortical bone (B).

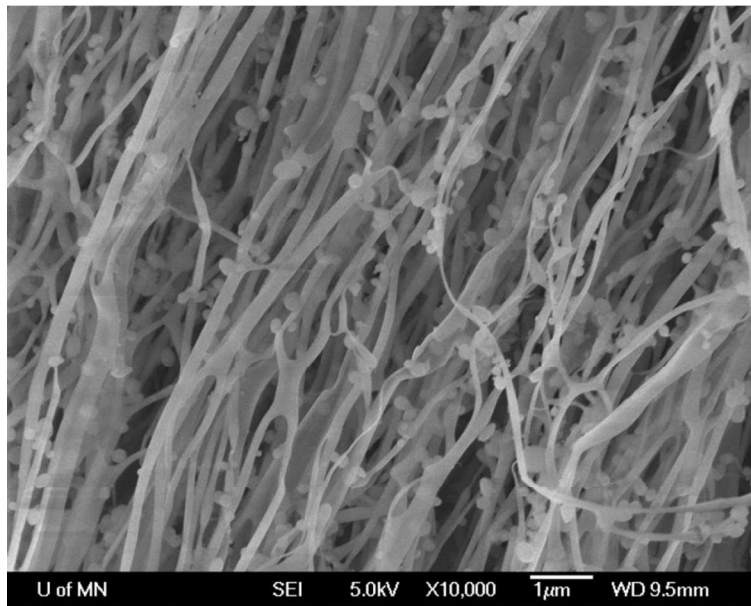

**Figure S4.** SEM images of 50 mg/ml HSS<sub>3</sub> that was self-assembled at 37 °C.
